# Supplementary material for: Predominantly linear summation of metabotropic postsynaptic potentials follows coactivation of neurogliaform interneurons
Source: eLife journal article supplement (doi:10.7554/elife.65634), 2021-07-26
Supplement: supp [file elife_poa_e65634_Supplementary_file_1.xlsx]

## Sheet: Sheet1
Parameter	Value	References
Total dendritic surface	31,204 µm2
Dendritic spines surface	15,621 µm2
Dendritic shaft surface	15,583 µm2
GABAB receptor density	36 particles/µm2	(Degro et al., 2015)
GIRK channel density	12,2 particles/µm2	(Degro et al., 2015)
Number of GABA molecules released/release site	3750
Free GABA diffusion coefficient	0.76 µm2/ms	(Longsworth, 1952)
GABABR Kon rate	5*106 M-1s-1	(Sodickson & Bean, 1996); (Beenhakker & Huguenard, 2010)
GABABR Koff rate	5 s-1	(Sodickson & Bean, 1996); (Beenhakker & Huguenard, 2010)
Membrane associated molecules diffusion	4*10-9 cm2/s	(Perez et al., 2006)
G-protein Kon rate	6*107 M-1s-1	(Brinkerhoff et al., 2008)
G-protein hydrolysis	2-3 s-1	(Breitwieser & Szabo, 1988)
G-protein concentration	1200 /µm2	(Wang et al., 2016)
1st G-protein- GIRK Kon rate	2,6*105 M-1s-1	(Wang et al., 2016)
2st G-protein- GIRK Kon rate	5*105 M-1s-1	Supposition based on Wang et al 2016
3st G-protein- GIRK Kon rate	1,6*106 M-1s-1	Supposition based on Wang et al 2016
4st G-protein- GIRK Kon rate	107 M-1s-1	(Wang et al., 2016)
G-protein – GIRK Koff rate	500 s-1
G-protein (gamma-beta) –G (alpha) Kon	0.7*106 M-1s-1	(Yakubovich et al., 2015)
G-protein (gamma-beta) –G (alpha) Koff	0,0013 s-1	(Yakubovich et al., 2015)
GABABR activation time	50 ms	(Sodickson & Bean, 1996)
GabaBR deactivation	150 ms	(Sodickson & Bean, 1996)
GabaBR inactivation	1 s	(Sodickson & Bean, 1996)
GIRK open time	0.9 ms	(Velimirovic et al., 1996)
Simulation time steps	10-5 s
Simulation Iterations	100000
