# Supplementary material for: Predominantly linear summation of metabotropic postsynaptic potentials follows coactivation of neurogliaform interneurons
Source: eLife. 2021 Jul 26;10:e65634. doi: 10.7554/eLife.65634 (PMC8360660; doi:10.7554/eLife.65634)
Supplement: Supplementary file 1. [file elife-65634-supp1.xlsx]

## Sheet: Sheet1
Parameter	Value	References
Total dendritic surface	31,204 µm2
Dendritic spines surface	15,621 µm2
Dendritic shaft surface	15,583 µm2
GABAB receptor density	36 particles/µm2	(Degro et al., 2015)
GIRK channel density	12,2 particles/µm2	(Degro et al., 2015)
Number of GABA molecules released/release site	3750
Free GABA diffusion coefficient	0.76 µm2/ms	(Longsworth, 1952)
GABABR Kon rate	5*106 M-1s-1	(Sodickson & Bean, 1996); (Beenhakker & Huguenard, 2010)
GABABR Koff rate	5 s-1	(Sodickson & Bean, 1996); (Beenhakker & Huguenard, 2010)
Membrane associated molecules diffusion	4*10-9 cm2/s	(Perez et al., 2006)
G-protein Kon rate	6*107 M-1s-1	(Brinkerhoff et al., 2008)
G-protein hydrolysis	2-3 s-1	(Breitwieser & Szabo, 1988)
G-protein concentration	1200 /µm2	(Wang et al., 2016)
1st G-protein- GIRK Kon rate	2,6*105 M-1s-1	(Wang et al., 2016)
2st G-protein- GIRK Kon rate	5*105 M-1s-1	Supposition based on Wang et al 2016
3st G-protein- GIRK Kon rate	1,6*106 M-1s-1	Supposition based on Wang et al 2016
4st G-protein- GIRK Kon rate	107 M-1s-1	(Wang et al., 2016)
G-protein – GIRK Koff rate	500 s-1
G-protein (gamma-beta) –G (alpha) Kon	0.7*106 M-1s-1	(Yakubovich et al., 2015)
G-protein (gamma-beta) –G (alpha) Koff	0,0013 s-1	(Yakubovich et al., 2015)
GABABR activation time	50 ms	(Sodickson & Bean, 1996)
GabaBR deactivation	150 ms	(Sodickson & Bean, 1996)
GabaBR inactivation	1 s	(Sodickson & Bean, 1996)
GIRK open time	0.9 ms	(Velimirovic et al., 1996)
Simulation time steps	10-5 s
Simulation Iterations	100000
References
Beenhakker MP, Huguenard JR. 2010. Astrocytes as gatekeepers of GABAB receptor function. Journal of Neuroscience 30:15262–15276. DOI: https://doi.org/10.1523/JNEUROSCI.3243-10.2010
Breitwieser GE, Szabo G. 1988. Mechanism of muscarinic receptor-induced K+ channel activation as revealed by hydrolysis-resistant GTP analogues. Journal of General Physiology 91:469–493. DOI: https://doi.org/10.1085/ jgp.91.4.469, PMID: 2455765
Brinkerhoff CJ, Choi JS, Linderman JJ. 2008. Diffusion-limited reactions in G-protein activation: unexpected consequences of antagonist and agonist competition. Journal of Theoretical Biology 251:561–569. DOI: https://doi.org/10.1016/j.jtbi.2008.01.002, PMID: 18289560
Degro CE, Kulik A, Booker SA, Vida I. 2015. Compartmental distribution of GABAB receptor-mediated currents along the somatodendritic Axis of hippocampal principal cells. Frontiers in Synaptic Neuroscience 7:6. DOI: https://doi.org/10.3389/fnsyn.2015.00006, PMID: 25852540
Longsworth LG. 1952. Diffusion measurements, at 1°, of aqueous solutions of amino acids, peptides and sugars. Ournal of the American Chemical Society 649:1–2. DOI: https://doi.org/10.1021/ja01118a065
Perez JB, Segura JM, Abankwa D, Piguet J, Martinez KL, Vogel H. 2006. Monitoring the diffusion of single heterotrimeric G proteins in supported cell-membrane sheets reveals their partitioning into microdomains. Journal of Molecular Biology 363:918–930. DOI: https://doi.org/10.1016/j.jmb.2006.08.036, PMID: 16996083
Sodickson DL, Bean BP. 1996. GABAB receptor-activated inwardly rectifying potassium current in dissociated hippocampal CA3 neurons. The Journal of Neuroscience 16:6374–6385. DOI: https://doi.org/10.1523/ JNEUROSCI.16-20-06374.1996, PMID: 8815916
Velimirovic BM, Gordon EA, Lim NF, Navarro B, Clapham DE. 1996. The K+ channel inward rectifier subunits form a channel similar to neuronal G protein-gated K+ channel. FEBS Letters 379:31–37. DOI: https://doi.org/ 10.1016/0014-5793(95)01465-9, PMID: 8566224
Wang W, Touhara KK, Weir K, Bean BP, MacKinnon R. 2016. Cooperative regulation by G proteins and na(+) of neuronal GIRK2 K(+) channels. eLife 5:e15751. DOI: https://doi.org/10.7554/eLife.15751, PMID: 27074662
Yakubovich D, Berlin S, Kahanovitch U, Rubinstein M, Farhy-Tselnicker I, Styr B, Keren-Raifman T, Dessauer CW, Dascal N. 2015. A quantitative model of the GIRK1/2 channel reveals that its basal and evoked activities are controlled by unequal stoichiometry of ga and Gbg. PLOS Computational Biology 11:e1004598. DOI: https:// doi.org/10.1371/journal.pcbi.1004598
