# Supplementary material for: Predominantly linear summation of metabotropic postsynaptic potentials follows coactivation of neurogliaform interneurons
Source: eLife. 2021 Jul 26;10:e65634. doi: 10.7554/eLife.65634 (PMC8360660; doi:10.7554/eLife.65634)
Supplement: Supplementary file 2. [file elife-65634-supp2.xlsx]

## Sheet: Sheet1
		Distance from the release site (µm)	GABA concentration (µM)
			1 AP	2AP	3AP	4AP
		0.2	1017.06	1584.614	2010.05	2296.08
		0.25	520.97	811.56	1029.45	1175.94
		0.5	65.022	101.28	128.48	146.76
		0.8	15.92	24.8	31.46	35.94
		1	8.13	12.67	16.07	18.4
		1.5	2.42	4.58	5.81	6.64
		2	1.02	1.58	2.01	2.3
